# Supplementary material for: Time domain optical imaging of sterile soft tissue abscesses with Cy5.5-scVEGF
Source: Royal Society of Chemistry journal article supplement (doi:10.1039/c5mb00637f), 2008-05-01
Supplement: c5mb00637f2.xlsx [file c5mb00637f2.xlsx]

## Sheet: Table S1A Liver
	Baseline			S45-B			FR2-S45
Liver Metabolite	Lived	Died	VIP Score	Lived	Died	VIP Score	Lived	Died	VIP Score
β-hydroxybutyrate	0.06	0.0664462	0.371	0.00640667	0.0248727	0.796	0.00904667	0.02248	0.762
3-aminobutyrate	0.0734067	0.0735923	0.01	0.00628667	0.00939091	0.156	0.01198	0.0213	0.369
3-hydroxyisovalarate	0.068	0.0784	0.548	0.0034	0.0137818	0.936	-0.00304667	0.00034	0.5449
Acetate	0.862427	0.289654	1.165	0.0649733	0.0674727	0.006	-0.0582333	-0.1259	0.402
Adenosine	0.176447	0.205131	0.347	0.0647333	0.1737	1.264	-0.0577533	-0.02012	0.57
ADP	0.180947	0.237815	0.629	0.0456267	-0.0651364	1.159	-0.00340667	-0.04262	0.295
Alanine	1.691	1.42015	1.366	2.03671	2.50245	0.762	-0.53934	-1.02782	0.41
AMP	1.33329	0.885269	1.233	-0.153507	-0.0193364	0.433	0.175847	-0.39802	1.759
Arginine	0.76482	0.584008	0.74	0.191087	0.373873	0.779	-0.0243867	-0.05374	0.24
Asparagine	0.398293	0.302008	0.489	0.13838	0.0513727	0.662	0.01074	-0.12524	0.89
Aspartate	0.98414	0.7121	1.452	0.1976	0.443364	1.123	-0.390293	-0.74644	1.413
ATP	0.30172	0.1778	1.612	-0.06128	-0.0302273	0.304	0.01754	0.00768	0.119
Benzoate	0.193947	0.193646	0.005	-0.01646	-0.0436727	0.571	-0.02926	0.0688	1.379
Betaine	0.572873	0.470085	0.389	0.101093	0.129336	0.078	0.0269	0.28722	1.071
Choline	0.578173	0.609308	0.1	0.118053	0.144736	0.116	-0.0922333	0.43812	1.849
Citrate	0.202653	0.2343	0.344	-0.000113333	0.0420909	0.592	0.0723333	-0.05374	1.411
Creatine	0.3736	0.3198	0.309	0.155633	0.0431273	0.83	0.01008	0.01356	0.025
Creatinine	0.52484	0.808115	0.459	0.0885933	-0.445436	0.799	0.264647	0.07408	1.02
Dimethylamine	0.0608333	0.0484846	0.388	0.0221067	0.00627273	0.542	-0.0192333	0.01658	1.025
Formate	0.13118	0.0902692	0.807	-0.00722	0.0135364	0.434	0.0389667	0.00718	0.518
Fumarate	0.0499733	0.0406538	0.711	0.0298733	0.0306455	0.047	-0.0268333	-0.0243	0.139
Glucose	7.66677	6.37108	1.037	15.4023	24.1859	1.141	-16.0939	-17.2632	0.168
Glutamate	4.21187	3.11265	2.063	-1.03357	-0.185891	1.478	1.30085	0.05854	2.163
Glutamine	1.62941	1.27196	0.957	-0.356413	0.0616182	1.181	0.2927	-0.0178	1.408
Glutathione	1.60417	1.20413	1.094	0.144187	0.624209	1.01	-0.1795	-0.36766	0.547
Glycine	3.02587	2.50537	1.247	0.541933	1.21147	0.501	-0.87024	-1.5338	0.488
Glycerophosphocholine	8.76717	6.28982	1.785	0.0145733	1.2694	0.896	-2.69335	-2.49504	0.174
Histidine	0.285333	0.465369	0.779	0.22226	-0.0712364	0.965	-0.137213	-0.14582	0.073
Hypoxanthine	0.21258	0.130462	2.158	-0.01636	0.0687727	1.603	-0.00749333	-0.01866	0.296
Isoleucine	0.13916	0.134508	0.168	0.0567933	0.137027	1.855	-0.0679867	-0.05252	0.299
Isovalerate	0.0508133	0.0422462	0.674	-0.00776667	0.00999091	1.487	0.00209333	0.00868	0.822
Lactate	1.83197	1.73997	0.1975	3.29301	4.91827	1.262	-2.37377	1.78176	2.215
Leucine	0.252893	0.237662	0.213	0.1107	0.265255	1.7	-0.12946	-0.17026	0.5444
Lysine	0.917967	0.609177	1.515	0.277507	0.190236	0.346	-0.0156333	0.32174	1.249
Maltose	3.17396	2.38924	0.813	-1.24455	-1.21169	0.039	-0.315053	0.33828	0.492
Methionine	0.31154	0.257092	0.814	-0.00707333	0.108027	1.425	0.12718	-0.0067	0.906
NAD+	0.560173	0.409054	2.031	0.00517333	0.125373	1.449	-0.03288	-0.10646	0.921
NADP+	0.200473	0.129954	1.909	-0.04546	0.0278	1.934	0.0125267	-0.02266	1.078
Niacinamide	0.17882	0.170731	0.167	-0.00982	0.0300091	0.735	0.0186067	0.04574	0.494
O-phosphocholine	2.37937	2.00676	0.925	-0.10992	0.7081	1.563	0.0979733	-0.49892	1.863
Phenylalanine	0.128	0.133838	0.166	0.463487	0.0782455	0.864	-0.150913	-0.00078	0.793
Proline	1.186	1.21393	0.086	0.02644	0.8451	0.886	-0.0266733	-0.1587	0.016
Pyruvate	0.295107	0.212662	0.682	0.0552067	0.0270909	0.193	-0.0113467	0.02448	0.38
Serine	4.93585	3.30953	2.085	0.287453	0.917345	0.572	-0.883347	-1.45124	0.437
Succinate	0.113033	0.0797692	0.921	0.00816	0.0402727	0.545	0.0535533	0.01872	0.848
Sucrose	1.79105	1.28707	0.891	-0.709007	-0.914918	0.401	-0.218047	0.30818	0.799
Taurine	1.19864	1.11026	0.23	0.500627	0.266927	0.357	-0.619647	0.27292	1.987
Tyrosine	0.07668	0.0780692	0.063	0.0482933	0.0909455	1.601	-0.0447067	-0.02462	0.548
UDP-glucose	0.660307	0.549046	0.97	-0.194773	-0.116055	0.736	0.14336	-0.1881	1.694
Valine	0.218307	0.207854	0.258	0.10756	0.239355	1.935	-0.117067	-0.10234	0.2
Xanthine	0.0505	0.0471231	0.301	0.00982	0.00677273	0.177	-0.00651333	0.02564	1.144
