# Supplementary material for: Time domain optical imaging of sterile soft tissue abscesses with Cy5.5-scVEGF
Source: Royal Society of Chemistry journal article supplement (doi:10.1039/c5mb00637f), 2008-05-01
Supplement: c5mb00637f4.xlsx [file c5mb00637f4.xlsx]

## Sheet: Sheet1
	Baseline			S45-B			FR2-S45
Muscle Metabolite	Lived	Died	VIP Score	Lived	Died	VIP Score	Lived	Died	VIP Score
α-ketoglutarate	0.476	0.48	0.037	0.119	0.555	0.476	-0.009	0.064	0.665
β-hydroxybutyrate	0.022	0.035	1.185	0.008	-0.005	1.598	0.038	0.035	0.1
3-hydroxyisovalerate	0.04	0.068	2.141	0.01	-0.005	2.066	0.001	0.007	1.096
AMP	0.166	0.101	0.678	-0.022	0.01	0.243	0.037	0.112	0.584
ATP	3.986	4.749	1.385	0.196	-0.324	1.263	-0.239	-0.96	1.57
Acetate	0.283	0.757	1.104	0.019	0.088	0.887	0.001	0.003	0.087
Alanine	2.428	2.495	0.215	0.783	0.672	0.278	0.16	0.664	1.095
Carnosine	8.154	9.206	0.931	-0.854	-1.391	0.587	-0.98	-1.197	0.24
Creatine	15.675	17.541	0.664	1.213	1.51	0.117	-2.003	-0.288	0.534
Creatine Phosphate	15.701	16.777	0.401	-1.187	-6.402	2.236	-1.485	-2.55	0.719
Formate	0.189	0.288	1.06	0.001	-0.005	0.166	0.032	0.013	0.693
Fumarate	0.022	0.03	0.989	0.019	0.018	0.052	-0.01	-0.008	0.091
Glucose	2.877	3.192	0.481	1.911	1.697	0.288	-1.803	-1.698	0.132
Glutamate	2.156	2.046	0.376	0.086	-0.135	0.814	-0.497	-0.745	0.677
Glutamine	3.835	4.05	0.376	0.947	1.024	0.129	-0.342	-0.065	0.362
Glycine	2.371	2.845	1.06	0.076	-0.449	1.772	-0.33	-0.428	0.358
Imidazole	0.146	0.236	1.951	0.151	0.075	1.084	-0.065	0.403	2.161
Isoleucine	0.092	0.112	1.473	0.017	0.006	0.923	0.01	0.004	0.351
Lactate	9.661	10.511	0.292	0.77	2.848	1.871	-2.128	5.629	1.307
Leucine	0.112	0.135	1.288	0.037	0.021	0.921	0.008	0.008	0.002
Mannose	0.326	0.393	0.495	0.262	0.303	0.322	-0.29	-0.176	0.951
Methylmalonate	0.067	0.068	0.075	0.02	0.015	0.183	-0.015	0.036	1.595
myo-Inositol	0.817	0.937	0.941	0.157	0.222	0.38	0.052	0.048	0.022
NAD+	0.387	0.443	0.853	-0.021	-0.07	0.953	-0.021	-0.06	1.014
Niacinamide	0.155	0.181	0.454	-0.019	-0.057	1.029	-0.003	0.043	1.758
Pantothenate	0.088	0.088	0.057	0.017	0.015	0.145	-0.004	0.015	1.373
Pyruvate	0.1	0.099	0.029	0.008	0.031	0.791	-0.011	0.023	0.946
Succinate	0.066	0.084	0.925	0.025	0.05	0.921	0.005	0.104	1.885
Taurine	7.024	7.656	0.569	2.183	1.937	0.154	0.423	1.745	0.775
Valine	0.148	0.194	2.043	0.033	0.011	1.002	0.021	-0.009	1.119
