# Supplementary material for: Time domain optical imaging of sterile soft tissue abscesses with Cy5.5-scVEGF
Source: Royal Society of Chemistry journal article supplement (doi:10.1039/c5mb00637f), 2008-05-01
Supplement: c5mb00637f5.xlsx [file c5mb00637f5.xlsx]

## Sheet: Sheet1
	Baseline			S45-B			FR2-S45
Serum Metabolites	Lived	Died	VIP Score	Lived	Died	VIP Score	Lived	Died	VIP Score
β-hydroxybutyrate	0.0771133	0.0742133	0.624	0.00816875	0.0371692	1.132	-0.0282312	-0.0524	0.851
2-aminoadipate	0.303207	0.317293	0.52	-0.0602563	-0.0746	0.557	-0.0131125	-0.10882	1.426
2-hydroxybutyrate	0.343607	0.3949	1.192	-0.0435938	0.0137615	1.069	0.00143125	-0.0384	0.45
2-oxovalarate	0.296327	0.295127	0.116	-0.0394938	-0.0409692	0.017	-0.0822	-0.22018	1.618
3-aminoisobutyrate	0.0435533	0.0633467	1.119	0.00711875	-0.00271538	0.56	-0.0166625	-0.01036	0.326
3-hydroxyisovalerate	0.05186	0.0485467	0.622	0.00224375	-0.00115385	0.476	-0.0076375	-0.00112	0.411
3-methyl-2-oxovalerate	0.0213733	0.0281133	1.392	0.00646875	0.00491538	0.686	-0.0052125	0.00152	1.1
Acetate	0.184473	0.16068	0.49	0.172875	0.162292	0.085	-0.106969	-0.11756	0.155
Acetoacetate	0.0697933	0.0517933	1.583	0.00111875	0.00356154	0.017	-0.0051375	-0.0267	1.217
Adenosine	0.0163467	0.01664	0.145	0.0289438	0.0454923	1.821	-0.032175	-0.04082	0.864
Adipate	0.3538	0.381613	0.485	-0.078575	-0.0607308	0.144	-0.0686625	-0.3277	2.208
Alanine	1.52659	1.69822	0.808	0.392581	0.284192	0.319	0.225025	0.32862	0.228
Arginine	0.769613	0.925633	1.247	-0.008725	-0.129723	0.753	0.06225	0.00912	0/403
Betaine	0.603753	0.494733	0.874	-0.127469	-0.0560769	0.943	0.119506	0.00626	1.07
Choline	0.135973	0.124747	0.996	0.0600813	0.128038	1.625	-0.0587312	-0.11432	1.001
Citrate	0.1348	0.154387	0.62	0.0577875	0.0251231	0.794	0.069175	0.29516	1.609
Creatine	0.589947	0.525113	0.768	0.287269	0.317215	0.153	-0.0252062	-0.109	0.32
Creatinine	0.194187	0.170127	1.275	0.0082875	0.0103692	0.035	-0.0200687	-0.02636	0.183
Cytidine	0.01394	0.01478	0.36	0.0155688	0.0250615	1.201	-0.018	-0.0266	0.86
Dimethylamine	0.0354067	0.0380467	0.243	0.0008875	-0.00862308	1.632	-0.00709375	-0.00364	0.483
Formate	0.198473	0.138567	1.644	0.0852937	0.0717231	0.008	0.128138	0.04454	1.049
Glucose	40.3542	37.847	0.425	22.5145	29.4054	0.456	-37.4138	-41.4663	0.419
Glutamate	1.17677	1.17503	0.107	-0.0612125	0.257569	2.409	-0.130762	-0.44356	1.617
Glutamine	1.47637	1.41367	0.368	-0.317025	-0.335	0.184	0.170156	0.12554	0.193
Glutathione	0.0564067	0.0498	0.595	-0.00215625	-0.00545385	0.036	-0.002575	0.00518	0.308
Glycerol	0.97404	0.89918	1.081	0.385969	0.723946	1.944	-0.426437	0.08078	1.378
Glycine	2.63591	3.00769	1.296	-0.215987	-0.635469	1.084	0.121931	-0.31616	0.886
Hippurate	0.0171067	0.00874	1.305	0.0103375	0.000869231	1.237	-0.0078625	0.00166	0.614
Histidine	0.220653	0.26354	2.009	-0.0197937	-0.0610231	1	0.03415	-0.00454	1.016
Hypoxanthine	0.01754	0.0187133	0.52	0.026625	0.0437846	1.665	-0.0321188	-0.0205	0.99
Isobutyrate	0.0198067	0.0225	0.838	0.00855625	0.00811538	0.096	0.00260625	0.00594	0.628
Isoleucine	0.34804	0.39324	1.02	0.0517875	-0.00189231	0.907	-0.075475	-0.16096	1.04
Lactate	6.15507	6.39058	0.247	12.9688	17.8393	1.225	-9.91746	-4.66268	1.376
Leucine	0.72132	0.796627	1.104	0.0332	-0.00830769	0.382	-0.145712	-0.34394	1.481
Mannose	0.58674	0.534787	0.515	-0.0844188	-0.0850692	0.047	-0.0752313	-0.13878	0.986
Methionine	0.113693	0.12444	0.669	-0.0162062	-0.0342	0.873	0.0103937	-0.0195	1.505
O-phosphocholine	0.317567	0.30472	0.314	-0.1041	-0.0838385	0.682	-0.0217563	-0.03882	0.544
Phenylacetate	0.05122	0.0598067	1.598	-0.00899375	-0.0162615	1.645	0.008625	-0.00074	0.543
Phenylalanine	0.148107	0.168387	1.218	0.0654625	0.0649231	0.141	-0.0248187	-0.06568	1.083
Proline	0.8192	0.96182	1.377	-0.020625	-0.153462	0.933	0.185638	0.17442	0.052
Pyruvate	0.415727	0.428153	0.029	0.241256	0.237308	0.324	-0.0894875	0.098	1.427
Serine	0.582313	0.70166	1.83	0.105406	0.0209385	0.862	-0.0222313	-0.15658	1.086
Succinate	0.01972	0.0175333	0.973	0.276531	0.650308	2.084	-0.273431	-0.24858	0.181
Threonine	0.458773	0.56254	1.871	0.0391437	-0.00550769	0.651	-0.0007875	-0.09348	1.119
Tyrosine	0.179033	0.192473	0.752	0.0528813	0.0347846	0.65	-0.00259375	-0.03978	0.979
Uridine	0.00884667	0.00854667	0.322	0.0054	0.0106615	0.801	-0.0087125	-0.00514	0.84
Valine	0.77088	0.862507	1.049	0.0320625	-0.0647154	0.817	-0.0947687	-0.23904	0.944
Urea*	6	7		2	1		1	0
