# Supplementary material for: Time domain optical imaging of sterile soft tissue abscesses with Cy5.5-scVEGF
Source: Royal Society of Chemistry journal article supplement (doi:10.1039/c5mb00637f), 2008-05-01
Supplement: c5mb00637f6.xlsx [file c5mb00637f6.xlsx]

## Sheet: Sheet1
	Baseline			S45			FR2
Urine Metabolites	Lived	Died	VIP Score	Lived	Died	VIP Score	Lived	Died	VIP Score
1,6-Anhydro-β-D-glucose	2389.83	3582.29	0.827	2038.33	2013.93	0.5934	3019	3455	0.428
1-Methylnicotinamide	23.4561	29.6656	1.074	19.8514	18.5516	2.1053	76	146	1.565
2-Ethylacrylate	12.4769	25.3253	1.672	12.5474	10.6589	0.0943	40	51	0.387
2-Methylglutarate	49.5015	62.4834	0.318	27.0793	32.43	0.2783	138	180	0.518
α-ketoglutarate	623.62	431.465	0.852	204.999	184.587	0.7581	1169	1360	0.263
3-Hydroxyisovalerate	29.9731	49.3967	0.682	18.5266	25.2471	0.8436	100	82	0.237
3-Methylxanthine	68.194	76.3042	0.272	29.267	31.0379	0.2895	59	126	1.764
4-Aminohippurate	75.0449	168.658	1.524	43.8301	85.5333	1.238	73	105	1.047
Acetate	62.2742	54.7967	0.519	29.5242	29.7726	0.4845	173	274	1.153
Acetoacetate	293.357	349.362	0.189	185.872	171.725	0.8064	380	364	0.1
Acetone	28.1621	38.5085	0.857	15.746	17.2421	0.562	75	196	1.889
Alanine	54.4747	86.625	0.44	33.0534	42.326	0.3262	605	682	0.12
Allantoin	2308.47	3009.63	0.103	1468.53	1549	0.3883	4414	6661	1.239
Betaine	275.124	308.212	0.21	86.9892	101.355	1.2759	477	963	1.34
Choline	220.516	344.016	0.011	184.89	152.514	0.8176	1256	2321	1.566
cis-Aconitate	151.943	227.412	0.983	100.043	102.533	0.1196	292	480	1.547
Citrate	1631.44	1209.9	1.241	677.822	542.876	0.8953	3303	3083	0.144
Creatine	241.284	315.587	0.128	110.12	87.0868	0.7635	770	367	0.623
Creatinine	3663.04	5338.02	0.462	2137.59	2388.25	0.1358	3529	3717	0.189
Cytosine	45.0178	61.7499	0.1	27.455	22.1368	0.6754	51	55	0.172
Dimethylamine	372.527	543.195	0.609	223.158	251.992	0.257	457	577	0.847
Ethanolamine	230.107	241.085	0.239	143.919	149.354	0.2516	525	615	0.39
Formate	219.484	251.644	0.344	122.659	118.701	0.1847	837	1247	1.015
Fumarate	78.9829	57.0274	1.116	32.6026	21.1013	1.4172	264	310	0.32
Glucose	49261.7	47375.5	0.49	14356.8	27197.6	0.5415	68731	129790	0.936
Glycine	600.811	744.716	1.04	316.565	473.61	1.4782	1269	2070	1.285
Hippurate	2471.82	709.683	2.391	3228.32	339.718	2.6283	8589	958	1.116
Histamine	70.2903	75.2613	0.186	38.5919	33.1093	0.6901	122	137	0.246
Histidine	70.3261	81.6738	0.109	47.6371	67.1929	0.228	130	167	0.471
Homogentisate	56.7132	68.4783	0.059	34.8142	28.4168	1.3625	62	76	0.663
Hypoxanthine	162.163	464.25	1.225	58.9593	194.681	2.1371	877	326	1.784
Inosine	22.4579	26.6907	0.361	15.2997	12.0095	1.387	55	60	0.284
Isovalerate	60.5239	95.0757	0.489	31.2032	42.4821	0.6498	204	234	0.211
Lactate	914.432	514.025	0.586	303.581	190.14	0.2148	41184	86016	1.171
Lactose	272.288	397.861	0.973	200.651	224.968	0.1089	574	679	0.473
Malonate	126.684	196.741	0.872	72.6071	80.7043	1.3795	234	367	1.039
Mannitol	1009.1	1511.09	0.545	548.417	661.839	0.3207	997	1629	1.317
Mannose	234.191	388.94	0.792	88.5132	190.481	1.7908	463	922	1.252
Methylguanidine	29.52	30.0333	0.309	14.9759	22.3221	1.4709	42	70	1.165
N,N-Dimethylglycine	57.6051	107.613	1.142	36.2725	46.095	0.2543	34	45	0.788
N-Methylhydantoin	69.3928	102.223	1.479	56.812	70.0239	1.2426	145	121	0.371
N-Phenylacetylglycine	230.942	288.264	0.1	143.693	148.593	0.5046	231	307	0.84
Niacinamide	13.09	14.9261	2.938	5.51281	4.52745	0.7435	44	84	1.466
Phenylacetylglycine	655.352	1010.62	0.516	362.232	443.52	0.9303	746	892	0.511
Phenylalanine	111.976	173.322	0.642	64.9364	58.9025	1.2294	117	313	1.78
pi-methylhistidine	62.7999	100.447	0.885	43.1002	43.9954	0.5987	150	137	0.161
Pyruvate	68.9926	77.0624	0.213	29.1515	38.6117	0.9886	1444	2543	0.921
Quinolinate	90.0696	126.914	0.546	58.554	57.8311	0.3429	131	125	0.135
Ribose	619.197	794.039	0.893	429.536	436.418	0.0771	1129	1417	0.629
Succinate	220.73	163.035	1.1	80.6257	77.1314	0.9901	216	202	0.152
Taurine	1056.83	1158.97	0.354	604.017	777.266	0.1477	1840	2514	0.896
Thymine	24.1197	38.5585	0.463	16.666	21.2487	0.5654	57	44	0.289
Tiglylglycine	50.056	53.439	0.524	27.3258	30.2555	0.0714	80	154	1.946
Trigonelline	57.0234	83.4185	0.761	35.8704	36.2238	0.2959	39	39	0
Trimethylamine	18.9443	9.42654	1.827	7.93359	5.9571	0.6508	64	100	0.867
Trimethylamine N-oxide	367.023	164.355	1.439	173.102	137.551	1.631	616	763	0.418
Tryptophan	57.708	53.1644	1.403	43.0209	28.6555	0.938	89	73	0.342
Tyramine	64.7215	111.817	1.266	49.7045	71.4495	1.4394	106	204	1.562
Tyrosine	101.757	156.009	1.016	66.2624	96.2631	0.7193	213	282	0.745
Urocanate	21.1698	72.565	2.731	16.3564	31.8513	1.6563	35	98	2.411
Xanthine	73.3292	134.541	0.623	40.3676	66.3942	1.5312	135	127	0.177
