# Supplementary material for: Metabolomic analysis of survival in carbohydrate pre-fed pigs subjected to shock and polytrauma
Source: Royal Society of Chemistry journal article supplement (doi:10.1039/c5mb00637f), 2016-03-11
Supplement: c5mb00637f7.pdf [file c5mb00637f7.pdf]

Supplemental Table 2. Blood oxygen parameters in pigs that lived and pigs that died after polytrauma and resuscitation.

|                                           | B                |                  |       | S45-B             |                              |               | FR2-S45             |                     |       |
|-------------------------------------------|------------------|------------------|-------|-------------------|------------------------------|---------------|---------------------|---------------------|-------|
|                                           | Lived (n=17)     | Died (n=15)      | p     | Lived (n=17)      | Died (n=13)                  | p             | Lived (n=17)        | Died (n=6)          | p     |
| PaO <sub>2</sub>                          | 112 (95,120)     | 109 (99,116)     | 0.911 | -1.5 (-12.5,7.5)  | -31 (-39,-20)                | <b>0.001*</b> | -13 (-31.6,-4)      | -16.5 (-30,14)      | 0.693 |
| DO <sub>2</sub>                           | 17.5 (15.1,20.1) | 17.9 (12.9,20.2) | 0.710 | -12.0 (-15.1,8.6) | -16.1 (-17.5,-12.8)          | 0.169         | 5.0 (3.4,5.8)       | 4.7 (2.0,9.3)       | 1.000 |
| ERO <sub>2</sub>                          | 21.4 (21.4,25.3) | 25.4 (23.5,31.6) | 0.071 | 55.4 (46.9,63.8)  | 64.0 (56.4,66.4)             | 0.074         | -30.1 (-36.7,-19.4) | -31.8 (-42.5,-20.8) | 0.677 |
| VO <sub>2</sub> (ml O <sub>2</sub> /min)  | 3.86 (3.38,4.41) | 4.33 (3.39,4.85) | 0.336 | 0.01 (-1.05,1.76) | -0.40 (-3.55,0.21)           | 0.169         | 0.75 (-0.01,2.46)   | 0.77 (0.27,0.98)    | 0.850 |
| SvO <sub>2</sub> (ml O <sub>2</sub> /min) | 77 (74,77)       | 74 (67,78)       | 0.114 | -56 (-63,-48)     | -64 (-69,-57)                | <b>0.029*</b> | 25 (18.5,34)        | 21.5 (16,34)        | 0.802 |
| PvO <sub>2</sub>                          | 43 (39,46)       | 40 (37,46)       | 0.455 | -22 (-26,-17)     | -24 (-31,-21)                | 0.161         | 10 (8,15)           | 10 (5,16)           | 1.000 |
| P:F ratio <sup>#</sup>                    | 456 (420,509)    | 469 (449,505)    | 0.655 | -3 (-52,34)       | -136 (-161,-86) <sup>#</sup> | <b>0.002*</b> | -52 (-140,-23)      | -107 (-155, 36)     | 0.858 |

Data is presented as median (interquartile range). DO<sub>2</sub> delivered oxygen, ERO<sub>2</sub> oxygen extraction ration, PaO<sub>2</sub> arterial partial pressure of oxygen, PvO<sub>2</sub> venous partial pressure of oxygen, P:F ratio PaO<sub>2</sub>/FiO<sub>2</sub> ratio, VO<sub>2</sub> systemic oxygen consumption, SvO<sub>2</sub> mixed venous oxygen saturation. \* p<0.05 in survivors versus non-survivors for the same time point/interval. <sup>#</sup> As a marker of acute respiratory failure, P:F ratio was compared at single time points (B, S45, FR2), not time intervals.
