# Supplementary figures and images for: Metabolomic analysis of survival in carbohydrate pre-fed pigs subjected to shock and polytrauma
Source: Royal Society of Chemistry journal article supplement (doi:10.1039/c5mb00637f), 2016-03-11

### Liver B

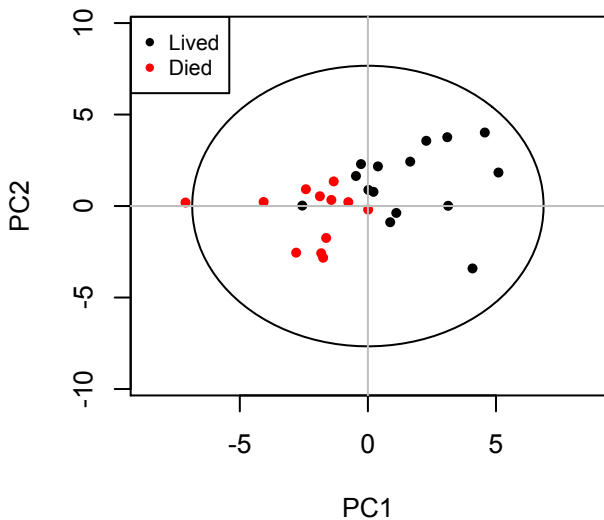

### Muscle B

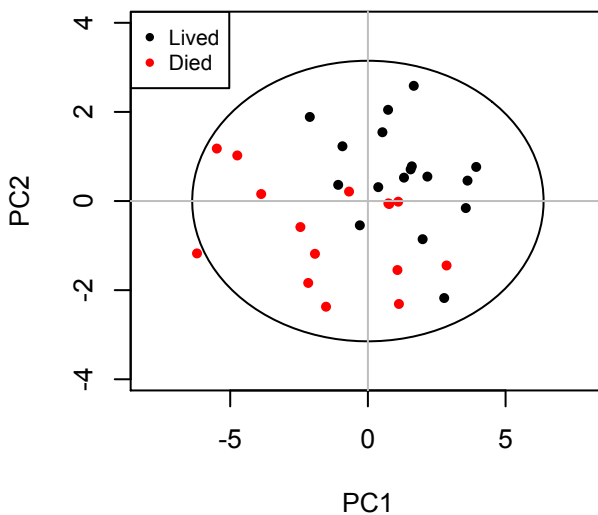

### Serum B

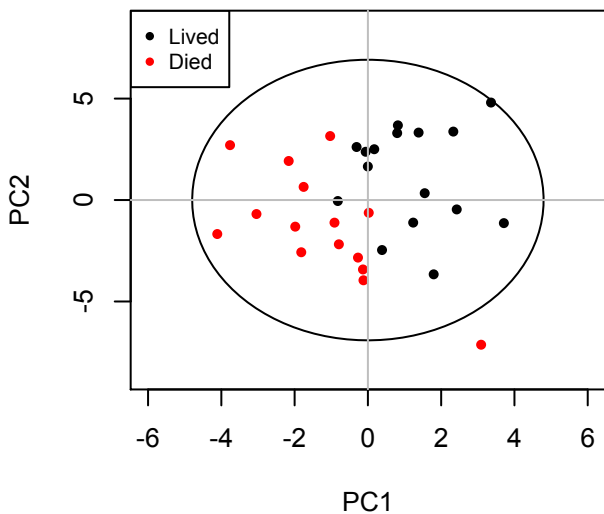

### Urine B

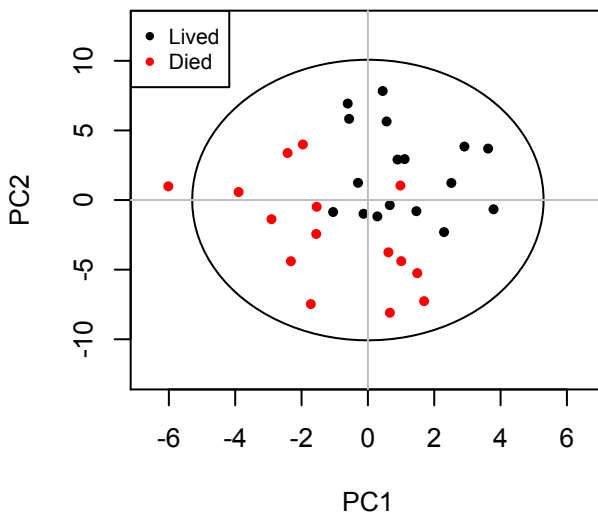

Supplement: c5mb00637f1.pdf [file c5mb00637f1.pdf]

### Liver FR2-S45

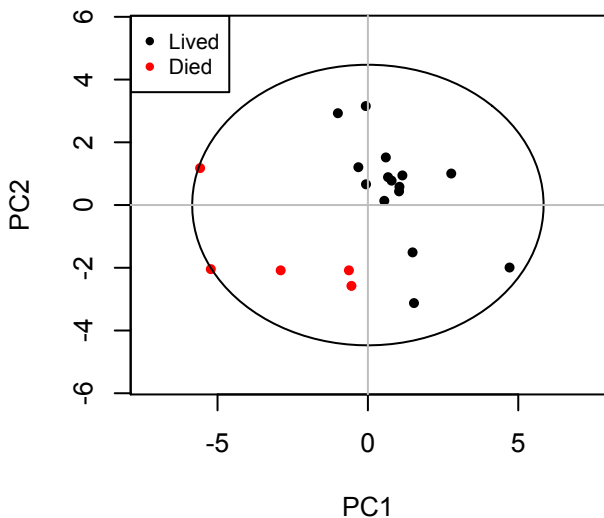

### Muscle FR2-S45

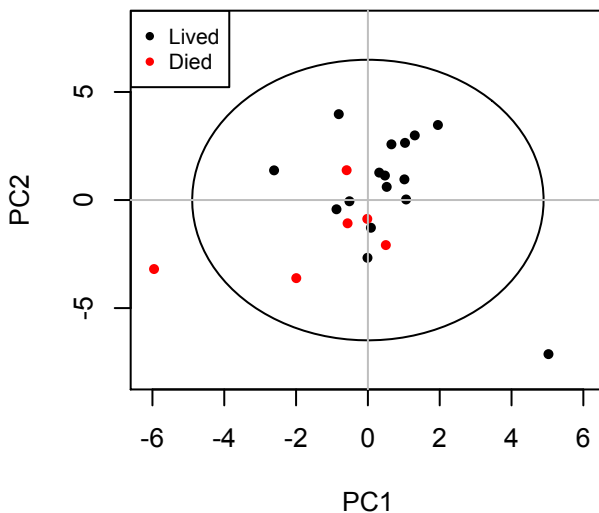

### Serum FR2-S45

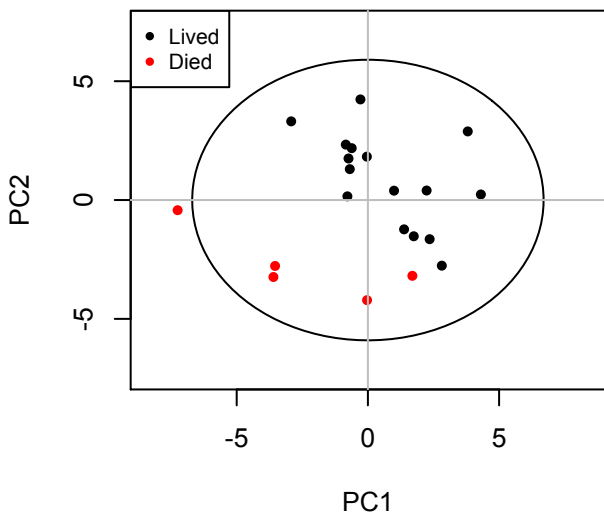

### Urine FR2

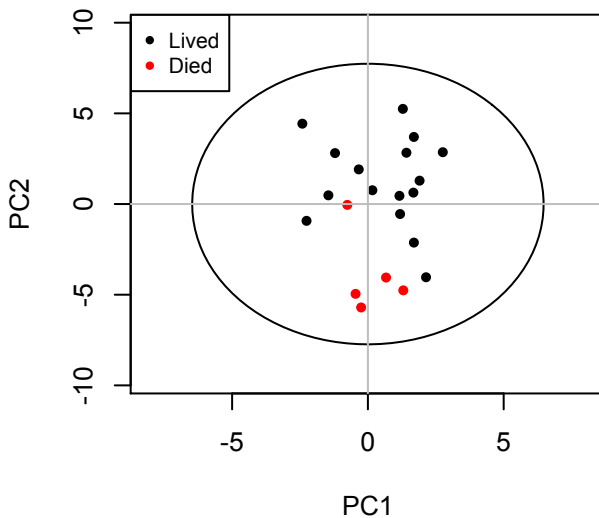

Supplement: c5mb00637f3.pdf [file c5mb00637f3.pdf]
